# Supplementary material
Source: PubMed Central journal article supplement (PMC1459894)
Supplement: cmaj_174_11_1589__3.pdf [file cmaj_174_11_1589__3.pdf]

**Appendix 6: Sensitivity analyses of opioids versus placebo**

| Characteristic                                                | Pain relief    |                |       |                |                    | Function       |                |       |                |                    |
|---------------------------------------------------------------|----------------|----------------|-------|----------------|--------------------|----------------|----------------|-------|----------------|--------------------|
|                                                               | No. of studies | No of patients | SMD   | 95% CI         | I <sup>2</sup> , % | No. of studies | No of patients | SMD   | 95% CI         | I <sup>2</sup> , % |
| All studies with appropriate data available for meta-analysis | 28             | 3741           | -0.60 | -0.69 to -0.50 | 48.2               | 20             | 3221           | -0.31 | -0.41 to -0.22 | 36.3               |
| <b>Type of opioid, etc., administered</b>                     |                |                |       |                |                    |                |                |       |                |                    |
| Codeine + acetaminophen                                       | 1              | 40             | -1.03 | -1.69 to -0.37 | NA                 |                |                |       |                |                    |
| Controlled-release codeine                                    | 2              | 126            | -0.74 | -1.10 to -0.38 | 0.0                | 2              | 126            | -0.92 | -1.55 to -0.29 | 64.6               |
| Tramadol                                                      | 9              | 1378           | -0.57 | -0.70 to -0.44 | 27.1               | 6              | 1122           | -0.30 | -0.45 to -0.16 | 30.8               |
| Tramadol + acetaminophen                                      | 3              | 921            | -0.57 | -0.89 to -0.24 | 87.8               | 4              | 1248           | -0.27 | -0.38 to -0.15 | 0.0                |
| Controlled-release oxycodone                                  | 4              | 391            | -0.66 | -0.87 to -0.45 | 3.7                | 3              | 307            | -0.34 | -0.57 to -0.12 | 0.0                |
| IR oxycodone + acetaminophen                                  | 1              | 73             | -0.73 | -1.21 to -0.26 | NA                 |                |                |       |                |                    |
| Long-acting morphine                                          | 7              | 476            | -0.51 | -0.76 to -0.26 | 37.6               | 5              | 418            | -0.21 | -0.44 to 0.02* | 21.0               |
| <b>Type of pain diagnosed</b>                                 |                |                |       |                |                    |                |                |       |                |                    |
| Neuropathic                                                   | 10             | 886            | -0.59 | -0.77 to -0.40 | 42.4               | 5              | 554            | -0.26 | -0.43 to -0.09 | 0.0                |
| Nociceptive                                                   | 17             | 2566           | -0.62 | -0.75 to -0.50 | 51.0               | 12             | 2240           | -0.34 | -0.47 to -0.20 | 55.8               |
| Fibromyalgia                                                  | 2              | 382            | -0.41 | -0.61 to -0.21 | 0.0                | 2              | 382            | -0.33 | -0.54 to -0.13 | 0.0                |
| Mixed neuropathic and nociceptive                             | 1              | 45             | -0.33 | -0.92 to 0.26* | NA                 | 1              | 45             | -0.35 | -0.94 to 0.24* | NA                 |
| <b>Study's methodological quality</b>                         |                |                |       |                |                    |                |                |       |                |                    |
| High (score of 3-5)                                           | 25             | 3592           | -0.60 | -0.71 to -0.50 | 51.1               | 18             | 3114           | -0.33 | -0.42 to -0.23 | 39.1               |
| Low (score of 1 or 2)                                         | 3              | 149            | -0.51 | -0.92 to -0.09 | 24.6               | 2              | 107            | -0.04 | -0.42 to 0.34* | 0.0                |
| Alternative split:                                            |                |                |       |                |                    |                |                |       |                |                    |
| High (score of 4 or 5)                                        | 20             | 2952           | -0.60 | -0.71 to -0.49 | 48.0               | 15             | 2586           | -0.32 | -0.43 to -0.20 | 46.9               |
| Low (score of 1-3)                                            | 8              | 789            | -0.61 | -0.83 to -0.38 | 50.6               | 5              | 635            | -0.33 | -0.48 to -0.17 | 0.0                |
| <b>Study design</b>                                           |                |                |       |                |                    |                |                |       |                |                    |
| Parallel groups                                               | 19             | 3157           | -0.57 | -0.70 to -0.45 | 61.2               | 13             | 2741           | -0.30 | -0.38 to -0.22 | 7.0                |
| Crossover                                                     | 9              | 584            | -0.67 | -0.83 to -0.50 | 0.0                | 7              | 480            | -0.37 | -0.69 to -0.06 | 64.4               |

Note: SMD = standardized mean differences, CI = confidence interval, I<sup>2</sup> is a test of heterogeneity (higher values mean more heterogeneous), NA = not applicable (only 1 study), IR = immediate-release.

\*Statistically nonsignificant result.
