# Supplementary material
Source: PubMed Central journal article supplement (PMC1459894)
Supplement: cmaj_174_11_1589__7.pdf [file cmaj_174_11_1589__7.pdf]

**Appendix 10: Effectiveness of opioids (all types) versus nonsteroidal anti-inflammatory drugs and tricyclic antidepressants for chronic non-cancer-related pain (higher values = worse pain). Studies are ordered by strength of the opioid examined. SD = standard deviation, SMD = standardized mean difference, CI = confidence interval, APAP = acetaminophen, A = high-quality, SR = sustained release, B = low-quality, (B) = Bobyn, (S) = Salzman, CR = controlled release.**

Review: Opioids for chronic non-malignant pain  
 Comparison: 14 Opioids (all types) versus other analgesics for chronic non-malignant pain (all types)  
 Outcome: 01 Pain (higher values mean worse pain)

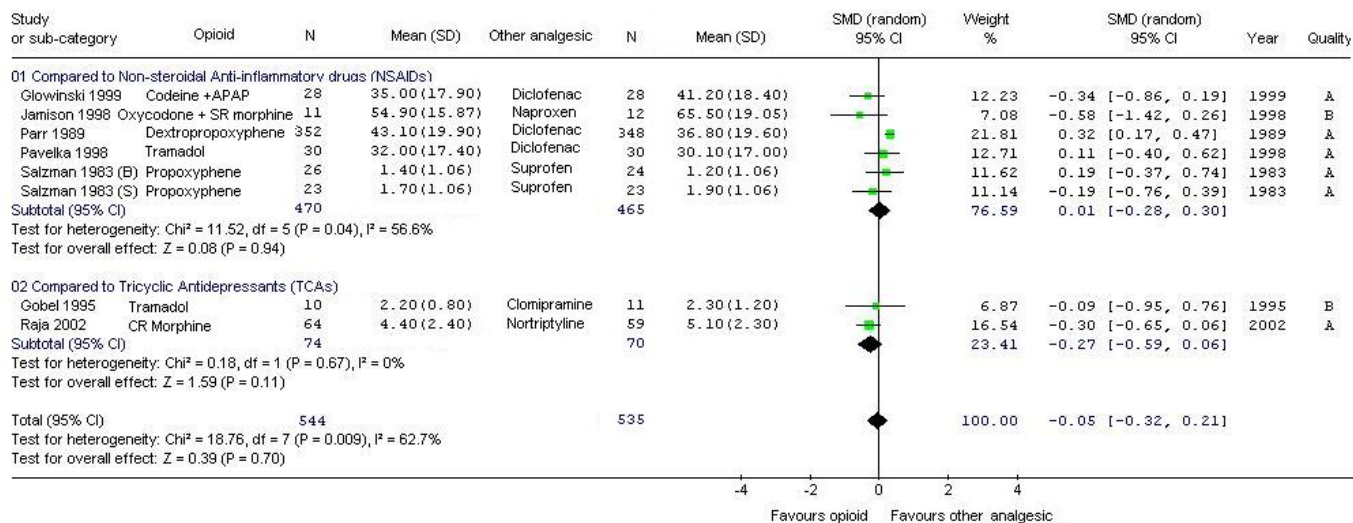

**References**

Glowinski J, Boccard E. Placebo-controlled study of the analgesic efficacy of a paracetamol 500 mg/codeine 30 mg combination together with low-dose vs high-dose diclofenac in rheumatoid arthritis. *Clin Drug Invest* 1999;18:189-97.

Gobel H, Stadler TH. Treatment of pain due to postherpetic neuralgia with tramadol: results of an open, parallel pilot study vs clomipramine with and without levomepromazine. *Clin Drug Invest* 1995;10:208-14.

Jamison RN, Raymond SA, Slawsby EA, et al. Opioid therapy for chronic noncancer back pain: a randomized prospective study. *Spine* 1998;23:2591-600.

Parr G, Darekar B, Fletcher A, et al. Joint pain and quality of life: results of a randomised trial. *Br J Clin Pharmacol* 1989;27:235-42.

Pavelka K, Peliskova Z, Stehlikova H, et al. Intraindividual differences in pain relief and functional improvement in osteoarthritis with diclofenac or tramadol. *Clin Drug Invest* 1998;16:421-9.

Raja SN, Haythornthwaite JA, Pappagallo M, et al. Opioids versus antidepressants in postherpetic neuralgia: a randomized, placebo-controlled trial. *Neurology* 2002;59:1015-21.

Salzman RT, Brobyn RD. Long-term comparison of suprofen and propoxyphene in patients with osteoarthritis. *Pharmacology* 1983;27(Suppl 1):55-64.
