# Supplementary material
Source: PubMed Central journal article supplement (PMC1459894)
Supplement: cmaj_174_11_1589__8.pdf [file cmaj_174_11_1589__8.pdf]

**Appendix 11: Sensitivity analyses\* of opioids versus other drugs for pain relief**

| Characteristics                                   | No. of studies | No. of patients | Random SMD (95% CI)    | I <sup>2</sup> , % |
|---------------------------------------------------|----------------|-----------------|------------------------|--------------------|
| All studies with available data for meta-analysis | 8              | 1079            | -0.05 (-0.32 to 0.21)  | 62.7               |
| Medication taken by control group                 |                |                 |                        |                    |
| Nonsteroidal anti-inflammatory drugs (NSAIDs)     | 6              | 935             | 0.01 (-1.28 to 0.30)   | 56.6               |
| Tricyclic antidepressants                         | 2              | 144             | -0.27 (-0.59 to 0.06)  | 0.0                |
| Type of opioid                                    |                |                 |                        |                    |
| Strong* (oxycodone, morphine)                     | 2              | 146             | -0.34 (-0.67 to -0.01) | 0.0                |
| Weak (propoxyphene, codeine, tramadol)            | 6              | 933             | 0.08 (-0.16 to 0.33)   | 41.5               |
| Methodological quality of study                   |                |                 |                        |                    |
| High (scores of 3-5)                              | 6              | 1035            | -0.01 (-0.29 to 0.28)  | 67.6               |
| Low (scores of 1 or 2)                            | 2              | 44              | -0.34 (-0.94 to 0.26)  | 0.0                |

Note: SMD = standardized mean differences, CI = confidence interval. I<sup>2</sup> is a test of heterogeneity (higher values mean more heterogeneous).

\*Results in this table are statistically *nonsignificant* except for those for strong opioids.
