# Supplementary material
Source: PubMed Central journal article supplement (PMC1459894)
Supplement: cmaj_174_11_1589__9.pdf [file cmaj_174_11_1589__9.pdf]

**Appendix 12:** Effectiveness of opioids (all types) versus nonsteroidal anti-inflammatory drugs and tricyclic antidepressants for function outcomes (higher values = more disabled). SD = standard deviation, SMD = standardized mean difference, CI = confidence interval, A = high-quality, CR = controlled release.

(formerly Fig. 7)

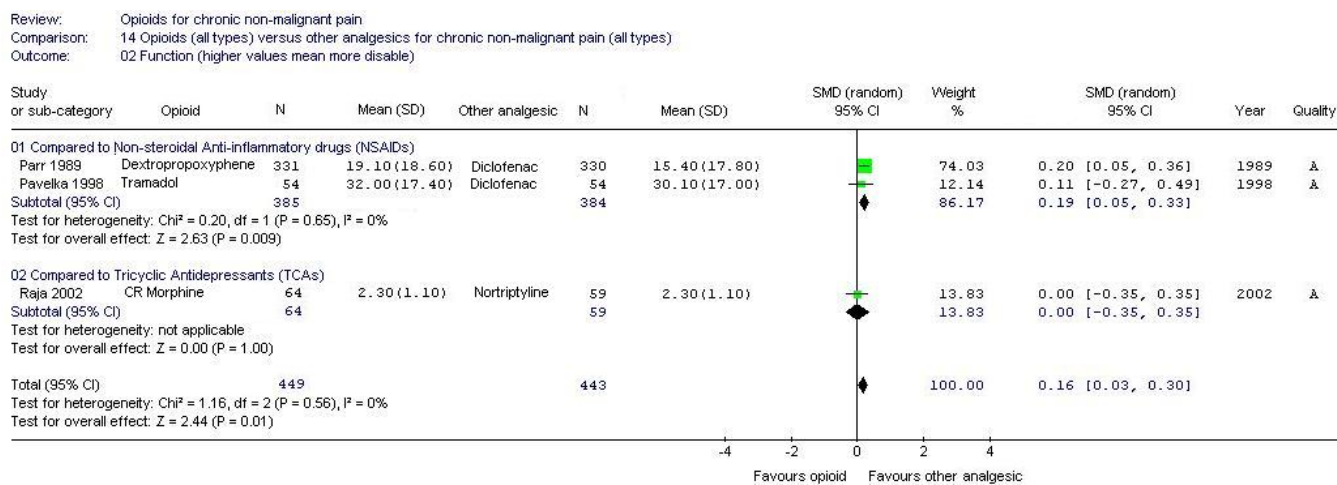

**References**

Parr G, Darekar B, Fletcher A, et al. Joint pain and quality of life: results of a randomised trial. *Br J Clin Pharmacol* 1989;27:235-42

Pavelka K, Peliskova Z, Stehlikova H, et al. Intraindividual differences in pain relief and functional improvement in osteoarthritis with diclofenac or tramadol. *Clin Drug Invest* 1998;16:421-9.

Raja SN, Haythornthwaite JA, Pappagallo M, et al. Opioids versus antidepressants in postherpetic neuralgia: a randomized, placebo-controlled trial. *Neurology* 2002;59:1015-21.
