# Supplementary material
Source: PubMed Central journal article supplement (PMC1459894)
Supplement: cmaj_174_11_1589__10.pdf [file cmaj_174_11_1589__10.pdf]

## Appendix 2: Search strategy for EMBASE

1. Randomized Controlled Trial/
2. (random: adj2 control: trial:).mp.
3. 1 or 2
4. control: clinical trial:.mp.
5. (control: adj2 trial:).mp.
6. 4 or 5
7. randomization/
8. random: allocation:.mp.
9. (random: adj2 allocation:).mp.
10. 8 or 9
11. Double Blind Procedure/
12. double-blind method:.mp.
13. Single Blind Procedure/
14. single-blind method:.mp.
15. or/1-14
16. limit 15 to (amphibia or ape or bird or cat or cattle or chicken or dog or "ducks and geese" or fish or "frogs and toads" or goat or guinea pig or "hamsters and gerbils" or horse or monkey or mouse or "pigeons and doves" or "rabbits and hares" or rat or reptile or sheep or swine)
17. exp animal/
18. 15 and 17
19. 16 or 18
20. limit 15 to human
21. 20 not 19
22. Clinical Trial/
23. exp clinical trial/
24. (clinic: adj25 trial:).tw.
25. ((singl: or doubl: or trebl: or tripl:) adj (mask: or blind:)).tw.
26. PLACEBO/
27. placebo:.mp.
28. random:.tw.
29. methodology/
30. latin square design/
31. (latin adj square).tw.
32. or/22-31
33. 32 not 19
34. Comparative Study/
35. evaluation/
36. follow up/
37. prospective study/
38. (control: or prospectiv: or volunteer:).tw.
39. Crossover Procedure/
40. or/34-39
41. 40 not 19
42. 21 or 33 or 41
43. Pain/pc, rh, dt, th [Prevention, Rehabilitation, Drug Therapy, Therapy]
44. Chronic Disease/pc, rh, dt, th [Prevention, Rehabilitation, Drug Therapy, Therapy]
45. (chronic adj3 pain).mp.
46. Low Back Pain/
47. (low adj back adj pain).mp.
48. or/43-47
49. exp Narcotic Analgesic Agent/
50. Codeine.mp.
51. Fentanyl.mp.
52. Hydromorphone.mp.
53. Levorphanol.mp.
54. Meperidine.mp.
55. Morphine.mp.
56. Oxycodone.mp.
57. Oxymorphone.mp.
58. Pentazocine.mp.
59. Propoxyphene.mp.
60. Tramadol.mp.sufentanil.mp
61. Tramadol.mp
62. or/49-63
63. or/50-63
64. 64 not 65
66. 65 not 49
67. 42 and 48 and 65
