# Supplementary material
Source: PubMed Central journal article supplement (PMC1459894)
Supplement: cmaj_174_11_1589__11.pdf [file cmaj_174_11_1589__11.pdf]

---

**Appendix 3:** Flow diagram according to the QUORUM guidelines. RCTs = randomized controlled trials.

---

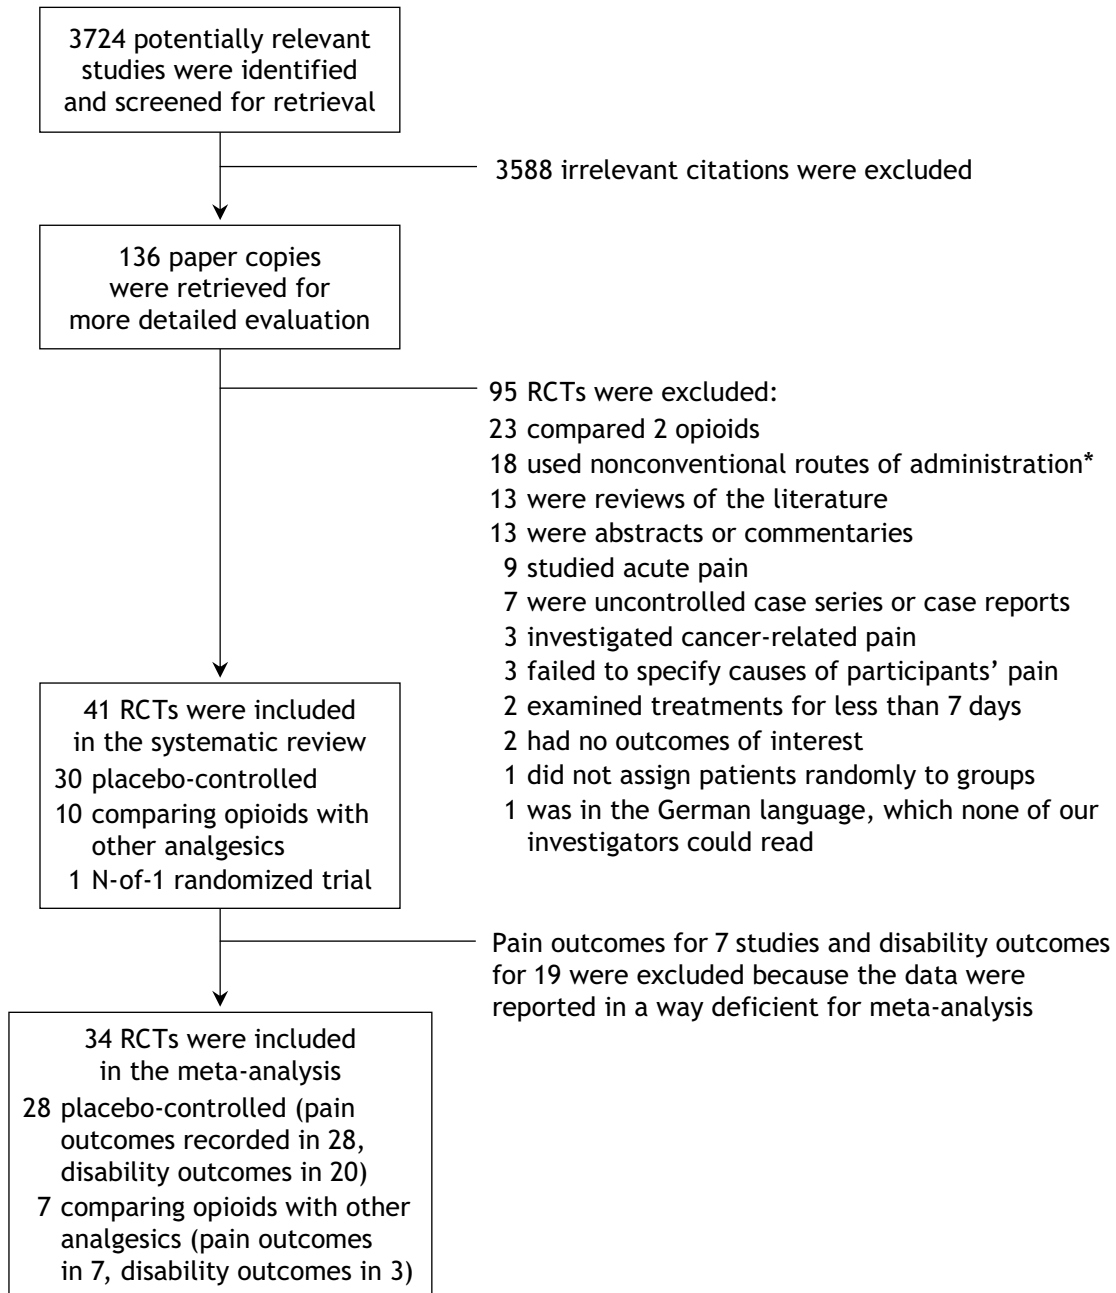

\* Routes not generally applied in doctors' offices: intramuscular, intravenous, subcutaneous, intra-articular or intra-thecal routes. (We included studies that used oral, transdermal or suppository-based routes of drug administration.)
