# Supplementary material
Source: PubMed Central journal article supplement (PMC1459894)
Supplement: cmaj_174_11_1589__12.pdf [file cmaj_174_11_1589__12.pdf]

**Appendix 4A:** Characteristics of randomized, placebo-controlled trials involving patients with neuropathic pain that were included in the meta-analysis

| Study report                                                    | Study population, n (withdrawals)                   | Intervention and dosage                                         | End points and outcomes                                                                                                                                                                                                                                                                                                                      |
|-----------------------------------------------------------------|-----------------------------------------------------|-----------------------------------------------------------------|----------------------------------------------------------------------------------------------------------------------------------------------------------------------------------------------------------------------------------------------------------------------------------------------------------------------------------------------|
| Harati 1998, USA<br>Parallel<br>Quality: 5                      | Diabetic neuropathy<br>131 (49)                     | Tramadol 50-400 mg/d for 6 wk                                   | Primary: pain intensity* (5-point Likert scale)<br>Secondary: pain relief, quality of life (Medical Outcomes Study) – physical functioning,* social functioning, current health perception, psychological distress, overall role functioning, and the 2 overall sleep problem indexes and sleep subscales<br>Results: see Appendixes 5 and 8 |
| Sindrup 1999, Germany<br>Crossover design<br>Quality: 5         | Polyneuropathy<br>45 (11)                           | Tramadol 200-400 mg/d for 4 wk                                  | Primary: pain ratings* (0-10 NRS), paresthesia and touch-evoked pain.<br>Secondary: dynamic allodynia, rescue medication, patient's preference<br>Results: see Appendix 5                                                                                                                                                                    |
| Boureau 2003, France<br>Parallel<br>Quality: 5                  | Postherpetic neuralgia<br>127 (19)                  | Tramadol 100-400 mg/d for 6 wk                                  | Primary: pain intensity (100-mm VAS* and 5-point NRS)<br>Secondary: Global improvement, quality of life (Nottingham scale) and rescue medication (paracetamol)<br>Results: see Appendix 5                                                                                                                                                    |
| Watson and Babul 1998, Canada<br>Crossover design<br>Quality: 3 | Postherpetic neuralgia<br>50 (12 lost to follow-up) | CR oxycodone 20-60 (mean 45) mg/d for 4 wk                      | Primary: pain intensity (100-mm VAS* and 5-point categorical scale)<br>Secondary: pain relief, steady pain, brief pain, skin pain, disability* (a categorical scale: 0 = no disability, 3 = severe disability), BDI, POMS<br>Results: see Appendixes 5 and 8                                                                                 |
| Watson 2003, Canada<br>Crossover design<br>Quality: 4           | Diabetic neuropathy<br>45 (3)                       | CR oxycodone 20-80 (mean 40) mg/d for 4 wk                      | Primary: pain intensity (100-mm VAS* and 5-point categorical scale)<br>Secondary: pain relief, steady pain, brief pain, skin pain, PDI,* SF-36, pain and sleep questionnaires<br>Results: see Appendixes 5 and 8                                                                                                                             |
| Gimbel 2003, USA<br>Parallel<br>Quality: 5                      | Diabetic neuropathy<br>159 (44)                     | CR oxycodone 20-120 (mean 37) mg/d for 6 wk                     | Primary: pain intensity* (0-10 numeric scale)<br>Secondary: current and worse pain, satisfaction, BPI (physical function score),* SF-36<br>Results: see Appendixes 5 and 8                                                                                                                                                                   |
| Huse 2001, Germany<br>Crossover<br>Quality: 4                   | Phantom limb pain<br>12 (3)                         | Oral retarded morphine 70-300 (mean 120) mg/d for 4 wk          | Primary: pain intensity* (2-cm VAS)<br>Secondary: PES, SDS, PRSS, WHYMPI, BSS<br>Results: see Appendix 5                                                                                                                                                                                                                                     |
| Harke 2001, Germany<br>Parallel<br>Quality: 4                   | Peripheral neuropathy<br>38 (3)                     | SR morphine 90 mg/d for 1 wk                                    | Pain intensity* (0-10 numeric analogue scale)<br>Results: see Appendix 5                                                                                                                                                                                                                                                                     |
| Raja 2002, USA<br>Crossover<br>Quality: 4                       | Postherpetic neuralgia<br>76 (32)                   | CR morphine 15-240 (mean 91) mg/d or methadone 15 mg/d for 6 wk | Primary: pain intensity* (0-10 NRS)<br>Secondary: pain relief, cognitive function, MPI* (physical functioning subscale), sleep, mood, global preference<br>Results: see Appendixes 5 and 8                                                                                                                                                   |

Note: Studies are ordered according to the opioids investigated, from weaker to stronger. NRS = numeric rating scale, CR = controlled-release, VAS = visual analog scale, BDI = Beck Depression Inventory, POMS = Profile of Mood State, PDI = Pain Disability Index, SF-36 = Short Form 36 Health Survey, BPI = Brief Pain Inventory, PES = Pain Experience Scale, SDS = Self-Rating Depression Scale, PRSS = Pain-Related Self-statement Scale, WHYMPI = West Haven-Yale Multidimensional Pain Inventory, BSS = Brief Stress Scale, SR = sustained release, MPI = Multidimensional Pain Inventory.

\*Data used in the meta-analysis.

## References

- Boureau F, Legallicier P, Kabir-Ahmadi M. Tramadol in post-herpetic neuralgia: a randomized, double-blind, placebo-controlled trial. *Pain* 2003;104:323-31.
- Gimbel JS, Richards P, Portenoy RK. Controlled-release oxycodone for pain in diabetic neuropathy: a randomized controlled trial. *Neurology* 2003;60:927-34.
- Harati Y, Gooch C, Swenson M, et al. Double-blind randomized trial of tramadol for the treatment of the pain of diabetic neuropathy. *Neurology* 1998;50:1842-6.
- Harke H, Gretenkort P, Ladleif HU, Rahman S, Harke O. The response of neuropathic pain and pain in complex regional pain syndrome I to carbamazepine and sustained-release morphine in patients pretreated with spinal cord stimulation: a double-blinded randomized study. *Anesth Analg* 2001;92:488-95.
- Huse E, Larbig W, Flor H, Birbaumer N. The effect of opioids on phantom limb pain and cortical reorganization. *Pain* 2001;90(1-2):47-55.
- Raja SN, Haythornthwaite JA, Pappagallo M, et al. Opioids versus antidepressants in postherpetic neuralgia: a randomized, placebo-controlled trial. *Neurology* 2002;59:1015-21.
- Sindrup SH, Andersen G, Madsen C, Smith T, Brosen K, Jensen TS. Tramadol relieves pain and allodynia in polyneuropathy: a randomised, double-blind, controlled trial. *Pain* 1999;83:85-90.
- Watson CP, Babul N. Efficacy of oxycodone in neuropathic pain: a randomized trial in postherpetic neuralgia. *Neurology* 1998;50:1837-41.
- Watson CP, Moulin D, Watt-Watson J, et al. Controlled-release oxycodone relieves neuropathic pain: a randomized controlled trial in painful diabetic neuropathy. *Pain* 2003;105:71-8.
