# Supplementary material
Source: PubMed Central journal article supplement (PMC1459894)
Supplement: cmaj_174_11_1589__13.pdf [file cmaj_174_11_1589__13.pdf]

**Appendix 4B:** Characteristics of randomized, placebo-controlled trials involving patients with nociceptive pain that were included in the meta-analysis

| Study report                                                | Study population, n (withdrawals)              | Intervention and dosage                                                                            | End points and outcomes                                                                                                                                                                                                                             |
|-------------------------------------------------------------|------------------------------------------------|----------------------------------------------------------------------------------------------------|-----------------------------------------------------------------------------------------------------------------------------------------------------------------------------------------------------------------------------------------------------|
| Roth 1998, USA<br>Parallel groups<br>Quality: 2             | Osteoarthritis, site unspecified<br>42 (8)     | Tramadol 200-400 mg/d for 2 wk                                                                     | Primary: time to exit from the study due to therapeutic failure<br>Secondary: severity of pain* (0-3 numeric scale), ability to perform activities<br>Results: see Appendix 5                                                                       |
| Silverfield 2002, USA<br>Parallel groups<br>Quality: 5      | Osteoarthritis, site unspecified<br>308 (68)   | Tramadol 37.5-70 mg/d + acetaminophen 325-650 mg/d for 1.5 wk                                      | Primary: pain intensity* (0-3 numeric scale), Pain relief<br>Secondary: SPID, WOMAC* (physical function subscale)<br>Results: see Appendixes 5 and 8                                                                                                |
| Emkey 2004, USA<br>Parallel groups<br>Quality: 3            | Osteoarthritis, site unspecified<br>307 (80)   | Tramadol 37.5-300 mg/d + acetaminophen 325-2600 mg/d for 11.5 wk                                   | Primary: pain intensity* (100-mm VAS)<br>Secondary: pain relief, WOMAC* (physical function subscale), SF-36 survey<br>Results: see Appendixes 5 and 8                                                                                               |
| Fleischmann 2001, USA<br>Parallel groups<br>Quality: 5      | Osteoarthritis of knee<br>129 (93)             | Tramadol 50-400 mg/d for 12 wk                                                                     | Primary: pain intensity* (0-4 Likert scale)<br>Secondary: pain relief, WOMAC* (overall), global assessment, time to failure<br>Results: see Appendixes 5 and 8                                                                                      |
| Babul 2004, USA<br>Parallel groups<br>Quality: 5            | Osteoarthritis of knee<br>246 (122)            | Tramadol 100-400 mg/d for 11 wk                                                                    | Primary: pain intensity* (100-mm VAS)<br>Secondary: WOMAC* (physical function subscale), CSPI<br>Results: see Appendixes 5 and 8                                                                                                                    |
| Ruoff 1999, USA<br>Parallel groups<br>Quality: 5            | Chronic joint pain<br>465 (6)                  | Tramadol daily for 2 wk, starting at 200 mg/d; 50 mg => 200 mg on day 4; 50 mg => 200 mg on day 10 | Primary: discontinuation due to adverse effect or ineffectiveness<br>Results: 40 patients (30.8% of group taking 200 mg/d from day 1) reached the primary end point; 31 (24.0%, from day 4); 20 (15.2%, from day 10); and 3 (4.4% of placebo group) |
| Schnitzer 1999, USA<br>Parallel groups<br>Quality: 3        | Osteoarthritis of knee<br>240 (4)              | Tramadol 200 mg/d + naproxen 750 mg/d reduced by 250 mg/d every 2 wk (8-wk study)                  | Primary: minimum effective naproxen dose<br>Results: addition of tramadol allowed a significant reduction in the dosage of naproxen without compromising pain relief                                                                                |
| Schnitzer 2000, USA<br>Parallel groups<br>Quality: 5        | Low-back pain<br>254 (22)                      | Tramadol 200-400 (mean 242) mg/d for 4 wk                                                          | Primary: time to exit the double-blind trial<br>Secondary: pain intensity* (10-cm VAS), Pain relief, SF-MPQ, RDQ*<br>Results: see Appendixes 5 and 8                                                                                                |
| Ruoff 2003, USA<br>Parallel groups<br>Quality: 4            | Low-back pain<br>322 (157)                     | Tramadol 37.5-300 (mean 157.5) mg/d + acetaminophen 325-2600 mg/d for 11.5 wk                      | Primary: pain intensity* (100-mm VAS)<br>Secondary: PRRS, SF-MPQ, RDQ,* SF-36<br>Results: see Appendixes 5 and 8                                                                                                                                    |
| Peloso 2004, Canada<br>Parallel groups<br>Quality: 4        | Low-back pain<br>338 (191)                     | Tramadol 37.5-300 (mean 158) mg/d + acetaminophen 325-2600 mg/d for 13 wk                          | Primary: pain intensity* (100-mm VAS)<br>Secondary: PRRS, SF-MPQ, SF-36, RDQ,* overall medication assessment<br>Results: see Appendixes 5 and 8                                                                                                     |
| Boureau 1991, France<br>Parallel groups<br>Quality: 3       | Rheumatoid arthritis<br>40 (2)                 | Codeine 90 mg/d + acetaminophen 1500 mg/d for 1 wk                                                 | Primary: pain intensity (100-mm VAS* and 5-point Likert scale)<br>Secondary: pain relief, activity, sleep, overall efficacy<br>Results: see Appendix 5                                                                                              |
| Arkininstall 1995, Canada<br>Crossover design<br>Quality: 4 | Mixed nociceptive pain<br>46 (16)              | CR codeine 200-400 mg/d for 1 wk                                                                   | Primary: pain intensity (100-mm VAS* and 5-point categorical scale)<br>Secondary: rescue acetaminophen + codeine consumption, PDI*<br>Results: see Appendixes 5 and 8                                                                               |
| Peloso 2000, Canada<br>Parallel groups<br>Quality: 4        | Osteoarthritis of hip or knee<br>103 (37)      | CR codeine 100-400 mg/d for 4 wk                                                                   | Primary: WOMAC pain intensity* (0-500 VAS)<br>Secondary: WOMAC* stiffness and physical function, sleep, global assessment<br>Results: see Appendixes 5 and 8                                                                                        |
| Roth 2000, USA<br>Parallel groups<br>Quality: 3             | Osteoarthritis<br>133 (70)                     | CR oxycodone for 2 wk:<br>A) 20 mg/d*<br>B) 40 mg/d                                                | Primary: pain intensity* (4-point numeric scale)<br>Secondary: quality of sleep, BPI, Interference of pain during key functional activities<br>Results: see Appendix 5                                                                              |
| Caldwell 1999, USA<br>Parallel groups<br>Quality: 4         | Osteoarthritis<br>107 (36)                     | Oxycodone for 4 wk:<br>A) IR 20 mg/d + acetaminophen 1300 mg/d*<br>B) CR 20 mg/d                   | Primary: pain intensity* (4-point numerical scale)<br>Secondary: global measure of sleep<br>Results: see Appendix 5                                                                                                                                 |
| Caldwell 2002, USA<br>Parallel groups<br>Quality: 3         | Osteoarthritis of hip and/or knee<br>295 (111) | Morphine 30 mg/d for 4 wk:<br>A) ER (morning)*<br>B) ER (evening)<br>C) CR 15 mg b.i.d.            | Primary: WOMAC pain (0-500) and overall arthritis pain intensity* (0-100)<br>Secondary: WOMAC stiffness and physical function* (0-1700)<br>Results: see Appendixes 5 and 8                                                                          |
| Moran 1991, UK<br>Crossover design<br>Quality: 2            | Rheumatoid arthritis<br>20 (16)                | CR morphine 20-120 mg/d for 2 wk                                                                   | Primary: pain intensity* (100-mm VAS)<br>Secondary: FIHAQ,* RS, GSS<br>Results: see Appendixes 5 and 8                                                                                                                                              |
| Moulin 1996, Canada<br>Crossover design<br>Quality: 2       | Musculoskeletal pain<br>61 (18)                | SR morphine 30-120 (mean 83.5) mg/d for 6 wk                                                       | Primary: pain intensity* (10-cm VAS)<br>Secondary: pain relief, MPQ, drug liking, use of rescue medication, SCL-90, POMS, SIP, PDI,* HSCS, patients' preferences<br>Results: see Appendixes 5 and 8                                                 |

Note: Studies are ordered according to the opioids investigated, from weaker to stronger. SPID = Sum of Pain Intensity Differences, WOMAC = Western Ontario and McMaster Universities Osteoarthritis Index, SF-36 = Short Form 36 Health Survey, VAS = visual analog scale, CSPI = Chronic Sleep Pain Inventory, SF-MPQ = short form of the McGill Pain Questionnaire, RDQ = Roland Disability Questionnaire, PRSS = Pain-Related Self-statement Scale, CR = controlled-release, PDI = Pain Disability Index, IR = immediate-release, ER = extended release, FIHAQ = Fries Index Health Assessment Questionnaire, RS = Ritchie Score, GSS = grip strength score, MPQ = McGill Pain Questionnaire, SCL = symptom checklist, POMS = Profile of Mood State, SIP = Sickness Impact Profile, HSCS = high sensitivity cognitive screening.

\*Data used in the meta-analysis.

## References

- Arkininstall W, Sandler A, Goughnour B, et al. Efficacy of controlled-release codeine in chronic non-malignant pain: a randomized, placebo-controlled clinical trial. *Pain* 1995;62:169-78.
- Babul N, Noveck R, Chipman H, Roth SH, Gana T, Albert K. Efficacy and safety of extended-release, once-daily tramadol in chronic pain: a randomized 12-week clinical trial in osteoarthritis of the knee. *J Pain Symptom Manage* 2004;28:59-71.

Boureau F, Boccard E. Placebo-controlled study of analgesic efficacy of 500 mg paracetamol 30 mg codeine association combined with a low dose of diclofenac versus high dose of diclofenac in rheumatoid arthritis. *Acta Ther* 1991;17:123-36.

Caldwell JR, Hale ME, Boyd RE, et al. Treatment of osteoarthritis pain with controlled release oxycodone or fixed combination oxycodone plus acetaminophen added to nonsteroidal antiinflammatory drugs: a double blind, randomized, multicenter, placebo controlled trial. *J Rheumatol* 1999;26:862-9.

Caldwell JR, Rapoport RJ, Davis JC, et al. Efficacy and safety of a once-daily morphine formulation in chronic, moderate-to-severe osteoarthritis pain: results from a randomized, placebo-controlled, double-blind trial and an open-label extension trial. *J Pain Symptom Manage* 2002;23:278-91.

Emkey R, Rosenthal N, Wu S-C, et al. Efficacy and safety of tramadol/acetaminophen tablets (Ultracet) as add-on therapy for osteoarthritis pain in subjects receiving a COX-2 nonsteroidal antiinflammatory drug: a multicenter, randomized, double-blind, placebo-controlled trial. *J Rheumatol* 2004;31:150-6.

Fleischmann RM, Caldwell JR, Roth SH, et al. Tramadol for the treatment of joint pain associated with osteoarthritis: a randomized, double-blinded, placebo-controlled trial. *Curr Ther Res* 2001;62:113-28.

Moran C. MST continus tablets and pain control in severe rheumatoid arthritis. *Br J Clin Res* 1991;2:1-12.

Moulin DE, Iezzi A, Amireh R, et al. Randomised trial of oral morphine for chronic non-cancer pain. *Lancet* 1996;347:143-7.

Peloso PM, Bellamy N, Bensen W, et al. Double blind randomized placebo control trial of controlled release codeine in the treatment of osteoarthritis of the hip or knee. *J Rheumatol* 2000;27:764-71.

Peloso PM, Fortin L, Beaulieu A, et al. Analgesic efficacy and safety of tramadol/acetaminophen combination tablets (Ultracet) in treatment of chronic low back pain: a multicenter, outpatient, randomized, double blind, placebo controlled trial. *J Rheumatol* 2004;31:2454-63.

Roth SH, Fleischmann RM, Burch FX, Dietz F, Bockow B, Rapoport RJ, Rutstein J, Lacouture PG. Around-the-clock, controlled-release oxycodone therapy for osteoarthritis-related pain: placebo-controlled trial and long-term evaluation. *Arch Intern Med* 2000;160:853-60.

Roth SH. Efficacy and safety of tramadol HCl in breakthrough musculoskeletal pain attributed to osteoarthritis. *J Rheumatol* 1998;25:1358-63.

Ruoff GE, Rosenthal N, Jordan D, et al. Tramadol/acetaminophen combination tablets for the treatment of chronic lower back pain: a multicenter, randomized, double-blind, placebo-controlled outpatient study. *Clin Ther* 2003;25:1123-41.

Ruoff GE. Slowing the initial titration rate of tramadol improves tolerability. *Pharmacotherapy* 1999;19:88-93.

Schnitzer TJ, Gray WL, Paster RZ, et al. Efficacy of tramadol in treatment of chronic low back pain. *J Rheumatol* 2000;27:772-8.

Schnitzer TJ, Kamin M, Olson WH. Tramadol allows reduction of naproxen dose among patients with naproxen-responsive osteoarthritis pain: a randomized, double-blind, placebo-controlled study. *Arthritis Rheum* 1999;42:1370-7.

Silverfield JC, Kamin M, Wu SC, et al. Study Group. Tramadol/acetaminophen combination tablets for the treatment of osteoarthritis flare pain: a multicenter, outpatient, randomized, double-blind, placebo-controlled, parallel-group, add-on study. *Clin Ther* 2002;24:282-97.
