# Supplementary material
Source: PubMed Central journal article supplement (PMC1459894)
Supplement: cmaj_174_11_1589__14.pdf [file cmaj_174_11_1589__14.pdf]

**Appendix 4C:** Characteristics of randomized, placebo-controlled trials involving patients with fibromyalgia or mixed neuropathic and nociceptive pain and an N-of-1 trial that were included in the meta-analysis

| Study report                                          | Study population, n (withdrawals)           | Intervention and dosage                                                    | End points and outcomes                                                                                                                                                                                               |
|-------------------------------------------------------|---------------------------------------------|----------------------------------------------------------------------------|-----------------------------------------------------------------------------------------------------------------------------------------------------------------------------------------------------------------------|
| <b>Fibromyalgia*</b>                                  |                                             |                                                                            |                                                                                                                                                                                                                       |
| Russell 2000, USA<br>Parallel groups<br>Quality: 5    | Fibromyalgia<br>69 (1)                      | Tramadol 50-400 mg/d for 6 wk                                              | Primary: No. of patients exiting because of inadequate pain relief<br>Secondary: pain intensity* (10-cm VAS), pain relief, tender-point count, myalgic score, FMIQ* (0-100)<br>Results: see Appendixes 5 and 8        |
| Bennett 2003, USA<br>Parallel groups<br>Quality: 5    | Fibromyalgia<br>315 (177)                   | Tramadol 37.5-300 mg/d + acetaminophen 325-2600 mg/d for 11.5 wk           | Primary: cumulative time of discontinuation due to lack of efficacy<br>Secondary: pain intensity* (100-mm VAS), pain relief, tender-point count, myalgic score, FMIQ,* SF-36,12-SQ<br>Results: see Appendixes 5 and 8 |
| <b>Mixed pain</b>                                     |                                             |                                                                            |                                                                                                                                                                                                                       |
| Maier 2002, Germany<br>Crossover design<br>Quality: 4 | 67% neuropathic, 32% nociceptive<br>49 (13) | SR morphine 10-180 (mean 114) mg/d for 1 wk                                | Primary: pain intensity* (0-10 NRS)<br>Secondary: tolerability of pain, sleep quality, physical fitness, mental state and mood, PDI,* complaints about symptoms<br>Results: see Appendixes 5 and 8                    |
| <b>N-of-1 randomized trial</b>                        |                                             |                                                                            |                                                                                                                                                                                                                       |
| Sheather-Reid 1998, Australia<br>Quality: 3           | Regional cervico-brachial pain<br>8 (3)     | For 4 wk:<br>A) Codeine 120 mg/d<br>B) Ibuprofen 800 mg/d<br>Placebo group | Primary: pain intensity (VAS)<br>Secondary: change in pain, uptime and hours of sleep<br>Results: analgesic efficacy with either drug was inadequate in the 5 subjects who completed the 12-week trial                |

Note: VAS = visual analog scale, FMIQ = Fibromyalgia Impact Questionnaire, SF-36 = Short Form 36 Health Survey, 12-SQ = 12-item sleep questionnaire, SR = sustained release, NRS = numeric rating scale, PDI = Pain Disability Index.

\*Data used in the meta-analysis.

## References

- Arkininstall W, Sandler A, Goughnour B, et al. Efficacy of controlled-release codeine in chronic non-malignant pain: a randomized, placebo-controlled clinical trial. *Pain* 1995;62:169-78.
- Babul N, Noveck R, Chipman H, Roth SH, Gana T, Albert K. Efficacy and safety of extended-release, once-daily tramadol in chronic pain: a randomized 12-week clinical trial in osteoarthritis of the knee. *J Pain Symptom Manage* 2004;28:59-71.
- Bennett RM, Kamin M, Karim R, Rosenthal N. Tramadol and acetaminophen combination tablets in the treatment of fibromyalgia pain: a double-blind, randomized, placebo-controlled study. *Am J Med* 2003;114:537-45.
- Boureau F, Boccard E. Placebo-controlled study of analgesic efficacy of 500 mg paracetamol 30 mg codeine association combined with a low dose of diclofenac versus high dose of diclofenac in rheumatoid arthritis. *Acta Ther* 1991;17:123-36.
- Boureau F, Legallier P, Kabir-Ahmadi M. Tramadol in post-herpetic neuralgia: a randomized, double-blind, placebo-controlled trial. *Pain* 2003;104:323-31.
- Caldwell JR, Hale ME, Boyd RE, et al. Treatment of osteoarthritis pain with controlled release oxycodone or fixed combination oxycodone plus acetaminophen added to nonsteroidal antiinflammatory drugs: a double blind, randomized, multicenter, placebo controlled trial. *J Rheumatol* 1999;26:862-9.
- Caldwell JR, Rapoport RJ, Davis JC, et al. Efficacy and safety of a once-daily morphine formulation in chronic, moderate-to-severe osteoarthritis pain: results from a randomized, placebo-controlled, double-blind trial and an open-label extension trial. *J Pain Symptom Manage* 2002;23:278-91.
- Emkey R, Rosenthal N, Wu S-C, et al. Efficacy and safety of tramadol/acetaminophen tablets (Ultracet) as add-on therapy for osteoarthritis pain in subjects receiving a COX-2 nonsteroidal antiinflammatory drug: a multicenter, randomized, double-blind, placebo-controlled trial. *J Rheumatol* 2004;31:150-6.
- Fleischmann RM, Caldwell JR, Roth SH, et al. Tramadol for the treatment of joint pain associated with osteoarthritis: a randomized, double-blinded, placebo-controlled trial. *Curr Ther Res* 2001;62:113-28.
- Gimbel JS, Richards P, Portenoy RK. Controlled-release oxycodone for pain in diabetic neuropathy: a randomized controlled trial. *Neurology* 2003;60:927-34.
- Glowinski J, Boccard E. Placebo-controlled study of the analgesic efficacy of a paracetamol 500 mg/codeine 30 mg combination together with low-dose vs high-dose diclofenac in rheumatoid arthritis. *Clin Drug Invest* 1999;18:189-97.
- Gobel H, Stadler TH. Treatment of pain due to postherpetic neuralgia with tramadol: results of an open, parallel pilot study vs clomipramine with and without levomepromazine. *Clin Drug Invest* 1995;10:208-14.
- Hale ME, Dvergsten C, Gimbel J. Efficacy and safety of oxymorphone extended release in chronic low back pain: results of a randomized, double-blind, placebo- and active-controlled phase III study. *J Pain* 2005;6:21-8.
- Harati Y, Gooch C, Swenson M, et al. Double-blind randomized trial of tramadol for the treatment of the pain of diabetic neuropathy. *Neurology* 1998;50:1842-6.
- Harke H, Gretenkort P, Ladleif HU, Rahman S, Harke O. The response of neuropathic pain and pain in complex regional pain syndrome I to carbamazepine and sustained-release morphine in patients pretreated with spinal cord stimulation: a double-blinded randomized study. *Anesth Analg* 2001;92:488-95.

Huse E, Larbig W, Flor H, Birbaumer N. The effect of opioids on phantom limb pain and cortical reorganization. *Pain* 2001;90(1-2):47-55.

Jamison RN, Raymond SA, Slawsby EA, et al. Opioid therapy for chronic noncancer back pain: a randomized prospective study. *Spine* 1998;23:2591-600.

Kjaersgaard-Andersen P, Nafei A, Skov O, et al. Codeine plus paracetamol versus paracetamol in longer-term treatment of chronic pain due to osteoarthritis of the hip: a randomised, double-blind, multi-centre study. *Pain* 1990;43:309-18.

Maier C, Hildebrandt J, Klinger R, et al.; MONTAS Study Group. Morphine responsiveness, efficacy and tolerability in patients with chronic non-tumor associated pain – results of a double-blind placebo-controlled trial (MONTAS). *Pain* 2002;97:223-33.

Moran C. MST continous tablets and pain control in severe rheumatoid arthritis. *Br J Clin Res* 1991;2:1-12.

Morley JS, Bridson J, Nash TP, Miles JB, White S, Makin MK. Low-dose methadone has an analgesic effect in neuropathic pain: a double-blind randomized controlled crossover trial. *Palliat Med* 2003;17:576-87.

Moulin DE, Iezzi A, Amireh R, et al. Randomised trial of oral morphine for chronic non-cancer pain. *Lancet* 1996;347:143-7.

Parr G, Darekar B, Fletcher A, et al. Joint pain and quality of life: results of a randomised trial. *Br J Clin Pharmacol* 1989;27:235-42.

Pavelka K, Peliskova Z, Stehlikova H, et al. Intraindividual differences in pain relief and functional improvement in osteoarthritis with diclofenac or tramadol. *Clin Drug Invest* 1998;16:421-9.

Peloso PM, Bellamy N, Bensen W, et al. Double blind randomized placebo control trial of controlled release codeine in the treatment of osteoarthritis of the hip or knee. *J Rheumatol* 2000;27:764-71.

Peloso PM, Fortin L, Beaulieu A, et al. Analgesic efficacy and safety of tramadol/acetaminophen combination tablets (Ultracet) in treatment of chronic low back pain: a multicenter, outpatient, randomized, double blind, placebo controlled trial. *J Rheumatol* 2004;31:2454-63.

Quiding H, Grimstad J, Rusten K, Stubhaug A, Bremnes J, Breivik H. Ibuprofen plus codeine, ibuprofen, and placebo in a single- and multidose cross-over comparison for coxarthrosis pain. *Pain* 1992;50:303-7.

Raja SN, Haythornthwaite JA, Pappagallo M, et al. Opioids versus antidepressants in postherpetic neuralgia: a randomized, placebo-controlled trial. *Neurology* 2002;59:1015-21.

Roth SH, Fleischmann RM, Burch FX, Dietz F, Bockow B, Rapoport RJ, Rutstein J, Lacouture PG. Around-the-clock, controlled-release oxycodone therapy for osteoarthritis-related pain: placebo-controlled trial and long-term evaluation. *Arch Intern Med* 2000;160:853-60.

Roth SH. Efficacy and safety of tramadol HCl in breakthrough musculoskeletal pain attributed to osteoarthritis. *J Rheumatol* 1998;25:1358-63.

Ruoff GE, Rosenthal N, Jordan D, et al. Tramadol/acetaminophen combination tablets for the treatment of chronic lower back pain: a multicenter, randomized, double-blind, placebo-controlled outpatient study. *Clin Ther* 2003;25:1123-41.

Ruoff GE. Slowing the initial titration rate of tramadol improves tolerability. *Pharmacotherapy* 1999;19:88-93.

Russell J, Kamin M, Bennett RM, et al. Efficacy of tramadol in treatment of pain in fibromyalgia. *J Clin Rheumatol* 2000;6:250-7.

Salzman RT, Brobyn RD. Long-term comparison of suprofen and propoxyphene in patients with osteoarthritis. *Pharmacology* 1983;27(Suppl 1):55-64.

Schnitzer TJ, Gray WL, Paster RZ, et al. Efficacy of tramadol in treatment of chronic low back pain. *J Rheumatol* 2000;27:772-8.

Schnitzer TJ, Kamin M, Olson WH. Tramadol allows reduction of naproxen dose among patients with naproxen-responsive osteoarthritis pain: a randomized, double-blind, placebo-controlled study. *Arthritis Rheum* 1999;42:1370-7.

Sheather-Reid RB, Cohen M. Efficacy of analgesics in chronic pain: a series of N-of-1 studies. *J Pain Symptom Manage* 1998;15:244-52.

Silverfield JC, Kamin M, Wu SC, et al. Study Group. Tramadol/acetaminophen combination tablets for the treatment of osteoarthritis flare pain: a multicenter, outpatient, randomized, double-blind, placebo-controlled, parallel-group, add-on study. *Clin Ther* 2002;24:282-97.

Sindrup SH, Andersen G, Madsen C, Smith T, Broesen K, Jensen TS. Tramadol relieves pain and allodynia in polyneuropathy: a randomised, double-blind, controlled trial. *Pain* 1999;83:85-90.

Vlok GJ, van Vuren JP. Comparison of a standard ibuprofen treatment regimen with a new ibuprofen/paracetamol/codeine combination in chronic osteo-arthritis. *S Afr Med J* 1987;Suppl 1:4-6.

Watson CP, Babul N. Efficacy of oxycodone in neuropathic pain: a randomized trial in postherpetic neuralgia. *Neurology* 1998;50:1837-41.

Watson CP, Moulin D, Watt-Watson J, et al. Controlled-release oxycodone relieves neuropathic pain: a randomized controlled trial in painful diabetic neuropathy. *Pain* 2003;105:71-8.
