# Supplementary material
Source: PubMed Central journal article supplement (PMC1459894)
Supplement: cmaj_174_11_1589__15.pdf [file cmaj_174_11_1589__15.pdf]

**Appendix 4D:** Characteristics of randomized trials comparing opioids with other analgesics that were included in the meta-analysis

| Study report                                                       | Study population, n (withdrawals)                                                   | Intervention and dosage                                                                                                             | End points and outcomes                                                                                                                                                                                                            |
|--------------------------------------------------------------------|-------------------------------------------------------------------------------------|-------------------------------------------------------------------------------------------------------------------------------------|------------------------------------------------------------------------------------------------------------------------------------------------------------------------------------------------------------------------------------|
| Gobel 1995, Germany<br>Parallel<br>Quality: 1                      | Postherpetic neuralgia<br>35 (14)                                                   | Tramadol 200-600 mg/d for 6 wk<br>Control group: clomipramine 50-100 mg/d ± levomepromazine 25-50 mg/d                              | Primary: pain intensity* (5-point verbal rating scale)<br>Secondary: psychological and physical condition<br>Results: see Appendix 10                                                                                              |
| Pavelka 1998, Czech Republic<br>Crossoverdesign<br>Quality: 5      | Osteoarthritis of hip and knee<br>60 (6)                                            | Tramadol 150-300 mg/d for 4 wk<br>Controls: diclofenac 75-150 mg/d                                                                  | Primary: WOMAC index (pain,* stiffness and physical disability*)<br>Secondary: drug preference<br>Results: see Appendixes 10 and 12                                                                                                |
| Parr 1989, USA<br>Parallel<br>Quality: 3                           | Pain in 2 joints<br>846 (213)                                                       | Dextropropoxyphene 1080 mg/d + acetaminophen 1950 mg/d for 4 wk<br>Controls: SR diclofenac 100 mg/d                                 | Primary: pain intensity* (100-mm VAS)<br>Secondary: NHP*<br>Results: see Appendixes 10 and 12                                                                                                                                      |
| Salzman and Brobyn 1989, USA<br>Parallel<br>Quality: 3             | Osteoarthritis<br>57 (11 at 1 wk) in Salzman's group and 57 (7 at 1 wk) in Brobyn's | Propoxyphene 260 mg/d for 24 wk<br>Controls: suprofen 800 mg/d                                                                      | Primary: pain intensity* (5-point numerical scale)<br>Secondary: pain relief, global improvement<br>Results: see Appendix 10                                                                                                       |
| Glowinski 1999, France<br>Parallel<br>Quality: 3                   | Rheumatoid arthritis<br>60 (2)                                                      | Codeine 90 mg/d + acetaminophen 1500 mg/d for 1 wk                                                                                  | Primary: global efficacy (5-point verbal scale)<br>Secondary: pain intensity* (100-mm VAS), impairment of activity (4-point scale), duration of morning stiffness, no. of awakenings<br>Results: see Appendix 10                   |
| Kjaersgaard-Andersen 1990, Denmark<br>Parallel<br>Quality: 3       | Osteoarthritis of hip<br>161 (64)                                                   | Codeine 180 mg/d + acetaminophen 3000 mg/d for 4 wk<br>Controls: acetaminophen 3 g/d<br>Rescue medication: ibuprofen tablets 400 mg | Primary: daily intake of rescue medication<br>Secondary: daily and weekly hip pain<br>Results: at 7 days, the addition of codeine was better than acetaminophen alone; after this, the difference was statistically nonsignificant |
| Jamison 1998, USA<br>Parallel<br>Quality: 2                        | Back pain<br>36 (3)                                                                 | A) Oxycodone + morphine SR 90 mg/d for 16 wk*<br>B) Oxycodone SR 40 mg/d for 16 wk<br>Controls: naproxen 1 g/d                      | Primary: pain intensity* (0-100 scale)<br>Secondary: mood, level of activity (no. of hours), amount of study medication<br>Results: see Appendix 10                                                                                |
| Vlok 1987, Union of South Africa<br>Crossover design<br>Quality: 4 | Osteoarthritis<br>31 (3)                                                            | Codeine 20 mg/d + ibuprofen 400 mg/d + acetaminophen 500 mg/d for 4 wk<br>Controls: Ibuprofen 1200 mg/d                             | Primary: pain intensity (VAS)<br>Secondary: PAD, drug choice<br>Results: combination was better than ibuprofen alone                                                                                                               |
| Raja 2002, USA<br>Crossover design<br>Quality: 4                   | Postherpetic neuralgia<br>76 (32)                                                   | CR morphine up to 240 mg/d for 6 wk†<br>Controls: nortriptyline up to 160 mg/d‡                                                     | Primary: pain intensity* (0-10 NRS)<br>Secondary: pain relief, cognitive function, MPI* (physical functioning subscale), sleep, mood, global preference<br>Results: see Appendixes 10 and 12                                       |

Note: Studies are ordered according to the opioids investigated, from weaker to stronger. WOMAC = Western Ontario and Mc Master Universities Osteoarthritis Index, VAS = visual analog scale, NHP = Nottingham Health Profile, PAD = Pain Analogue Difference, NRS = numeric rating scale, MPI = Multidimensional Pain Inventory.

\*Data used in the meta-analysis.

†Methadone was an alternative opioid.

‡Desipramine was an alternative antidepressant.

## References

- Glowinski J, Boccard E. Placebo-controlled study of the analgesic efficacy of a paracetamol 500 mg/codeine 30 mg combination together with low-dose vs high-dose diclofenac in rheumatoid arthritis. *Clin Drug Invest* 1999;18:189-97.
- Gobel H, Stadler TH. Treatment of pain due to postherpetic neuralgia with tramadol: results of an open, parallel pilot study vs clomipramine with and without levomepromazine. *Clin Drug Invest* 1995;10:208-14.
- Jamison RN, Raymond SA, Slawsky EA, et al. Opioid therapy for chronic noncancer back pain: a randomized prospective study. *Spine* 1998;23:2591-600.
- Kjaersgaard-Andersen P, Nafei A, Skov O, et al. Codeine plus paracetamol versus paracetamol in longer-term treatment of chronic pain due to osteoarthritis of the hip: a randomised, double-blind, multi-centre study. *Pain* 1990;43:309-18.
- Parr G, Darekar B, Fletcher A, et al. Joint pain and quality of life: results of a randomised trial. *Br J Clin Pharmacol* 1989;27:235-42.
- Pavelka K, Peliskova Z, Stehlikova H, et al. Intraindividual differences in pain relief and functional improvement in osteoarthritis with diclofenac or tramadol. *Clin Drug Invest* 1998;16:421-9.
- Raja SN, Haythornthwaite JA, Pappagallo M, et al. Opioids versus antidepressants in postherpetic neuralgia: a randomized, placebo-controlled trial. *Neurology* 2002;59:1015-21.
- Roth SH, Fleischmann RM, Burch FX, Dietz F, Bockow B, Rapoport RJ, Rutstein J, Lacouture PG. Around-the-clock, controlled-release oxycodone therapy for osteoarthritis-related pain: placebo-controlled trial and long-term evaluation. *Arch Intern Med* 2000;160:853-60.
- Salzman RT, Brobyn RD. Long-term comparison of suprofen and propoxyphene in patients with osteoarthritis. *Pharmacology* 1983;27(Suppl 1):55-64.
- Vlok GJ, van Vuren JP. Comparison of a standard ibuprofen treatment regimen with a new ibuprofen/paracetamol/codeine combination in chronic osteo-arthritis. *S Afr Med J* 1987;Suppl 1:4-6.
